# Supplementary material
Source: Springer Nature journal article supplement (https://www.springermedizin.de/resource/supplementary/12960_2003_3_MOESM6_ESM.pdf/9569764)

Ratio from WHO dataset

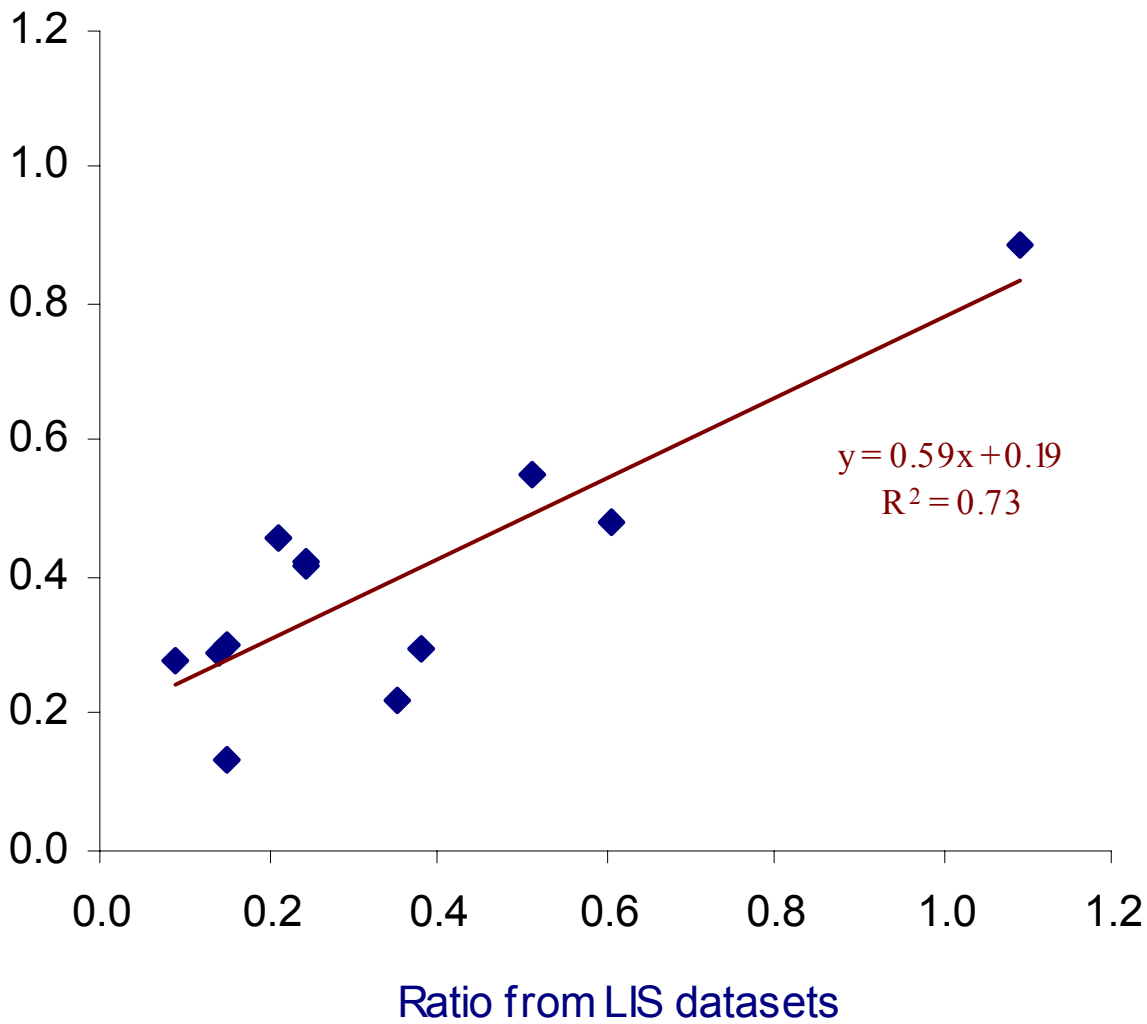

Supplement: MOESM6 [file 9569764]
